# Supplementary material for: Magnetite as a heterogeneous electro Fenton catalyst for the removal of Rhodamine B from aqueous solution
Source: Royal Society of Chemistry journal article supplement (doi:10.1039/c3ra46969g), 2014-01-01
Supplement: c3ra46969g.pdf [file c3ra46969g.pdf]

# Magnetite as a heterogeneous electro Fenton catalyst for the removal of Rhodamine B from aqueous solution

P. V. Nidheesh<sup>a</sup>, R. Gandhimathi<sup>\*a</sup>, S. Velmathi<sup>b</sup>, N. S. Sanjini<sup>b</sup>

5

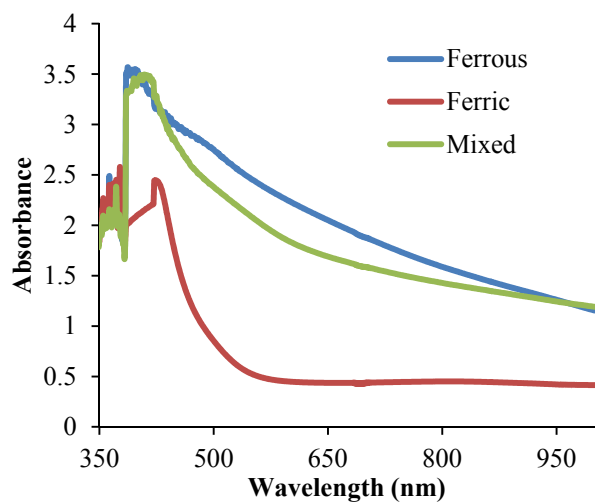

Fig. S1 UV Visible spectra of ferrous, ferric and mixed solutions

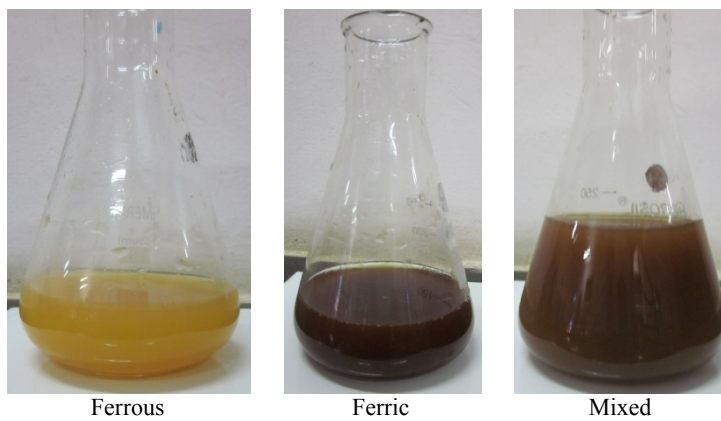

**Fig. S2** Color of ferrous, ferric and mixed solutions

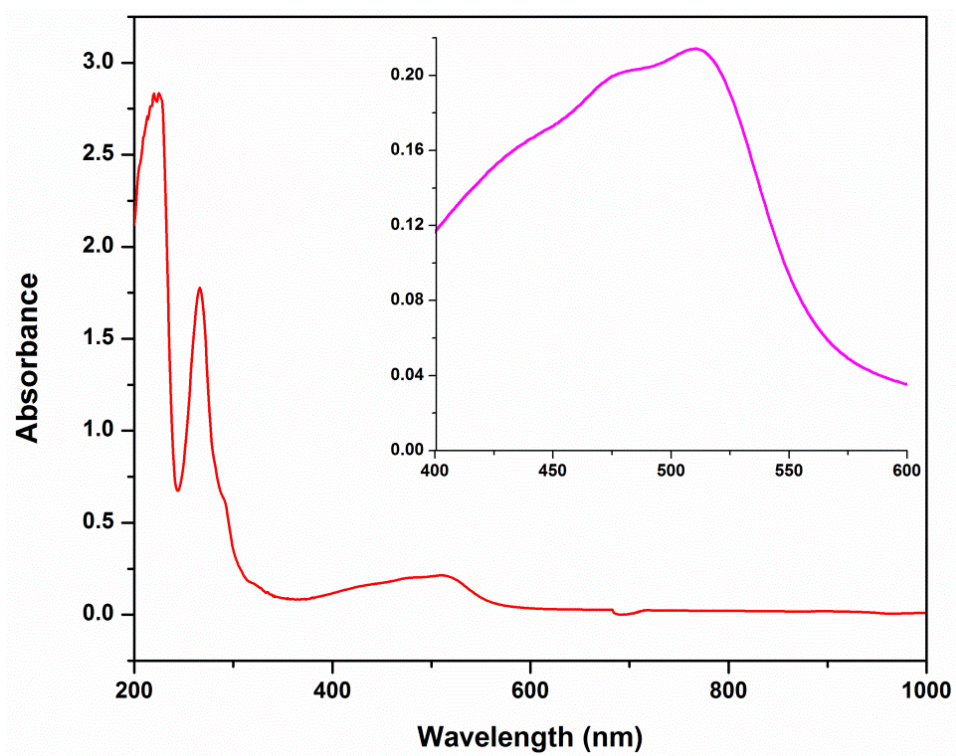

**Fig. S3** UV Visible spectra of the solution prepared according to modified 1,10-phenanthroline method

5

10

15

20

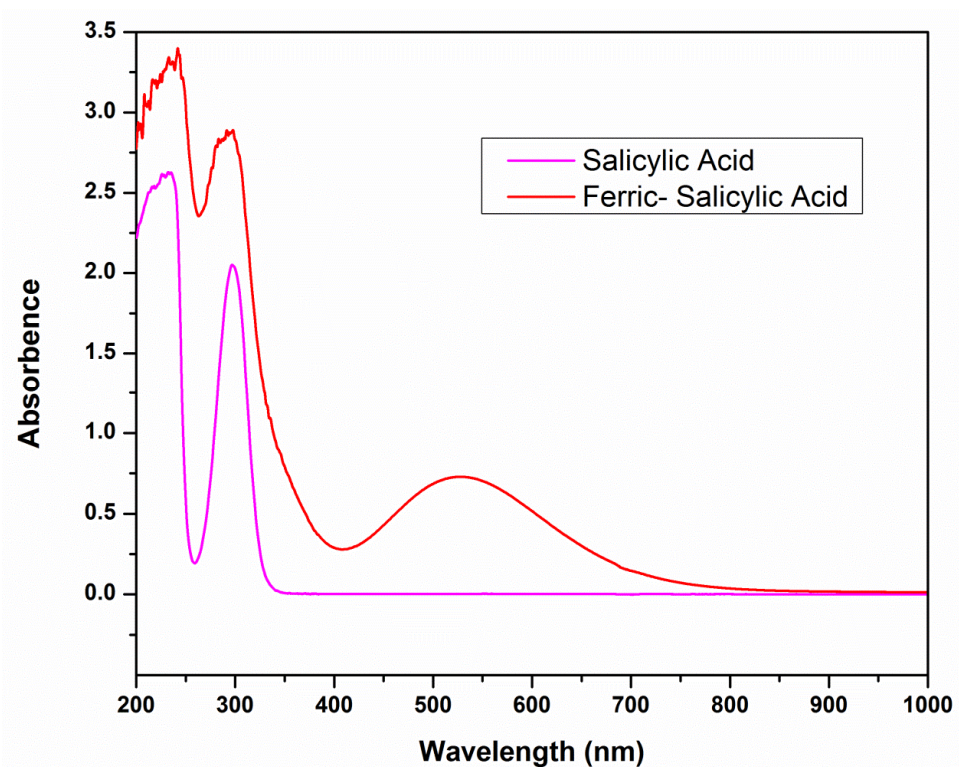

Fig. S4 UV Visible spectra of salicylic acid and ferric-salicylic acid solution

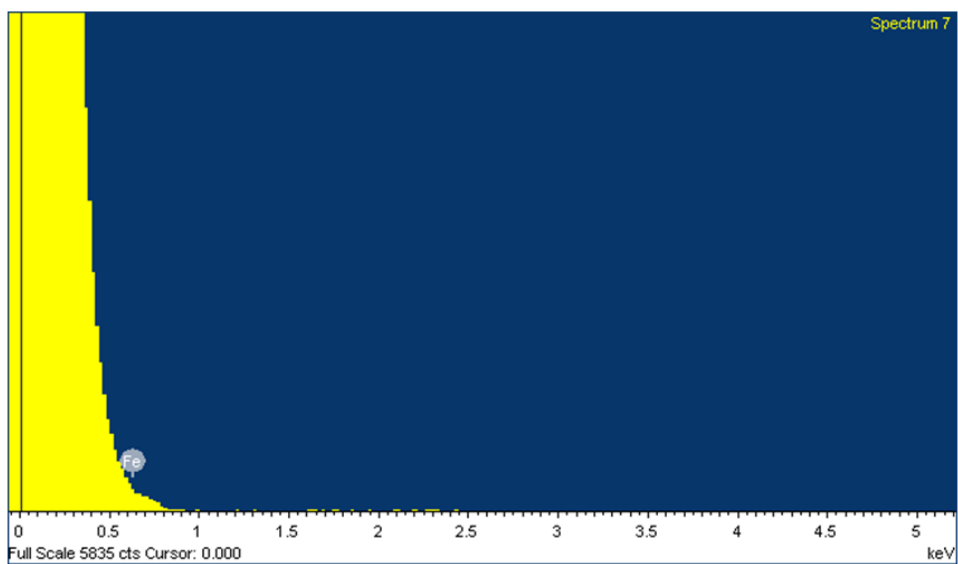

**Fig. S5** EDX spectra of prepared catalyst

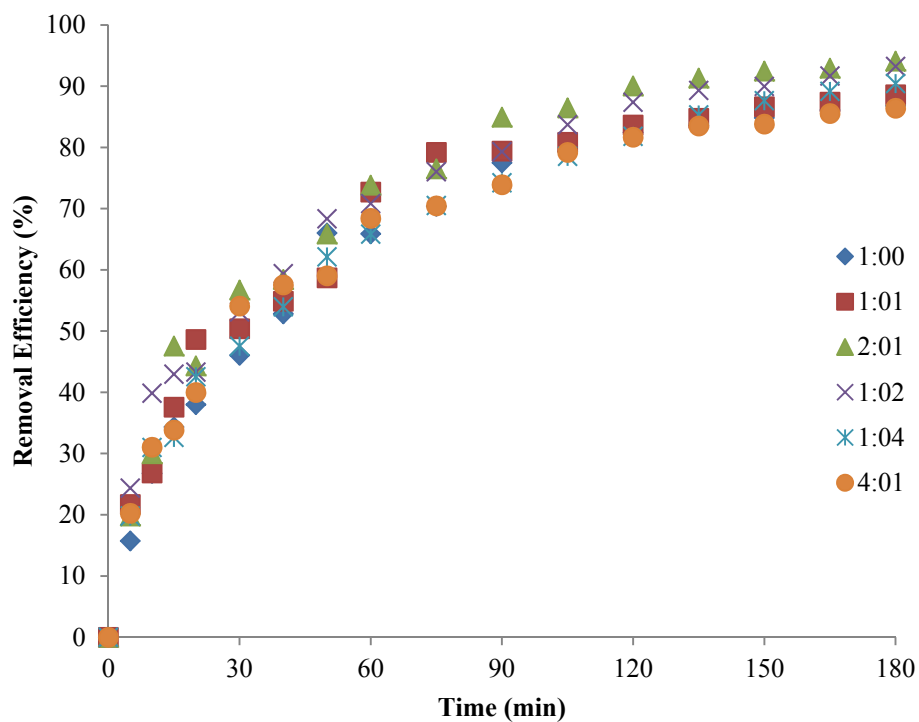

Fig. S6 RhB removal kinetics of magnetites at various ferrous/ferric concentrations

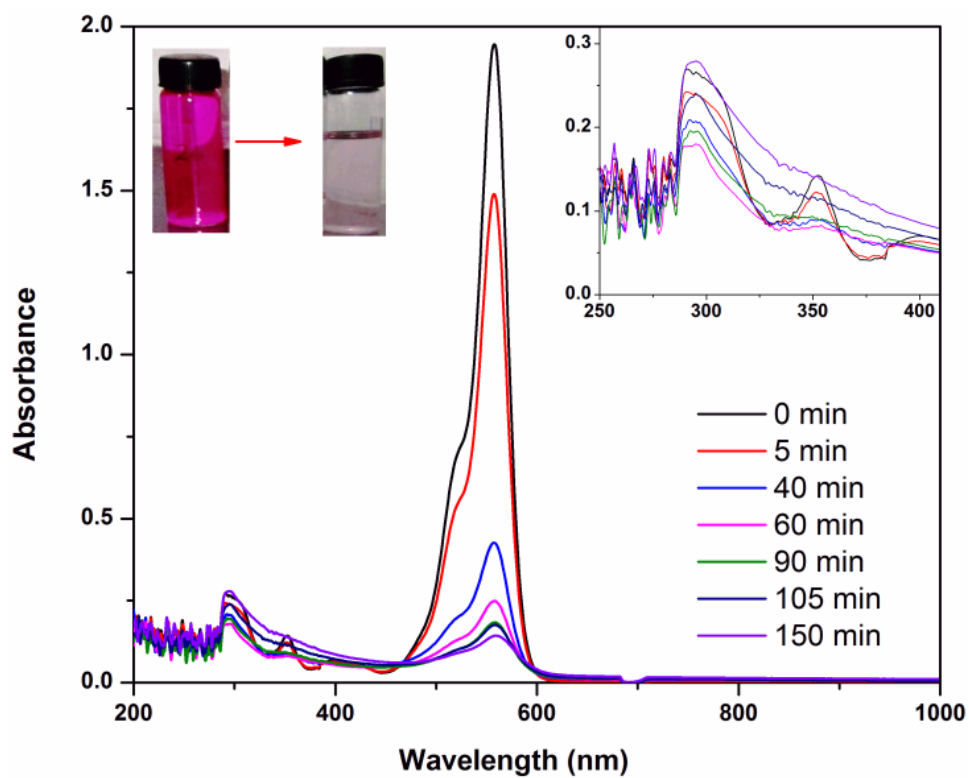

Fig. S7 UV Visible absorption spectra of RhB at various electrolysis times (Inset: Initial and Final color of RhB solution)

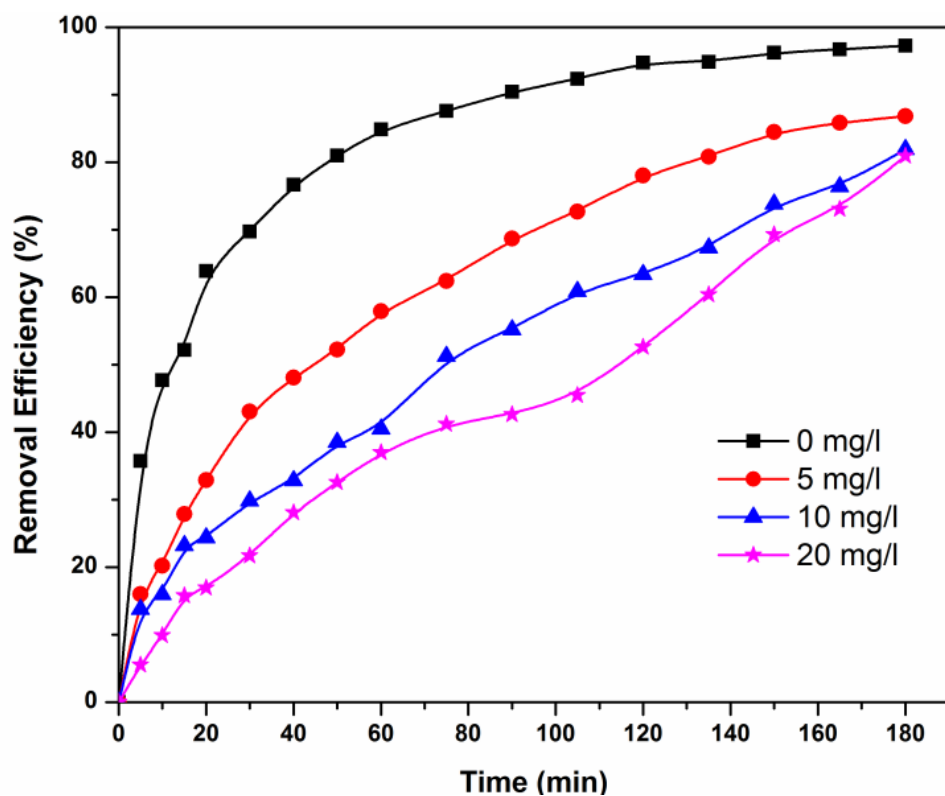

Fig. S8 Effect of chloride ion concentration on RhB removal kinetics

(Experimental conditions: initial RhB concentration of 10 mg/l, solution pH 3, catalyst concentration of 10 mg/l, applied voltage of 8 V, electrode area of 25 cm<sup>2</sup> and inner electrode spacing of 4 cm)



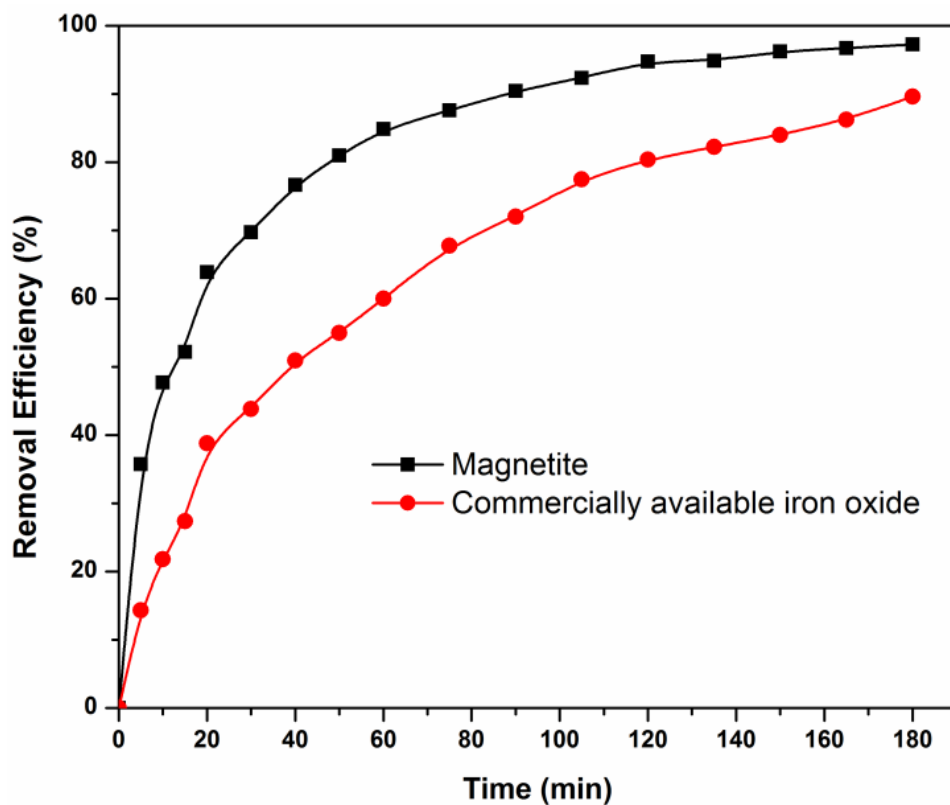

**Fig. S9** RhB removal efficiencies of commercially available iron oxide and magnetite

(Experimental conditions: initial RhB concentration of 10 mg/l, solution pH 3, catalyst concentration of 10 mg/l, applied voltage of 8 V, electrode area of 25 cm<sup>2</sup> and inner electrode spacing of 4 cm)
